# Supplementary material for: De novo identification of satellite DNAs in the sequenced genomes of Drosophila virilis and D. americana using the RepeatExplorer and TAREAN pipelines
Source: PubMed Central journal article supplement (PMC6922343; doi:10.1371/journal.pone.0223466), 2019-12-19

## Cluster no. 2

[Go back to cluster table](#)

Cluster is part of [supercluster: 2](#)

### Cluster characteristics:

|                       |                                                                                                                                                          |
|-----------------------|----------------------------------------------------------------------------------------------------------------------------------------------------------|
| size                  | 13980                                                                                                                                                    |
| size_real             | 13980                                                                                                                                                    |
| ecount                | 9974464                                                                                                                                                  |
| supercluster          | 2                                                                                                                                                        |
| annotations_summary   | 0.01% Class_I/LTR/Ty3_gypsy:Ty3-GAG<br>0.01% 45S_rDNA/25S_rDNA<br>0.01% Class_I/LTR/Ty3_gypsy:Ty3-INT                                                    |
| pair_completeness     | 0.709882583170254                                                                                                                                        |
| pbs_score             | 0                                                                                                                                                        |
| TR_score              | 0.508430588235294                                                                                                                                        |
| TR_monomer_length     | 154                                                                                                                                                      |
| loop_index            | 0.936552217453505                                                                                                                                        |
| satellite_probability | 0.0357308176144574                                                                                                                                       |
| consensus             | TTTTGTTTTCAAGATATCTTGACCAAACCTGGCATTATTAAGTTTTACTATACCTCATATATATGCAAAATCCTATT<br>AAGATCGGACCACATATCATATAGCTGCCATAGGAACGATCGGTCGAAAATTAAGTTTTGTATGAAAAACA |
| TAREAN_annotation     | Putative satellite (low confidence)                                                                                                                      |
| orientation_score     | 1                                                                                                                                                        |

### Reads annotation summary

|                   | cl_string         | domain | Freq    | proportion |
|-------------------|-------------------|--------|---------|------------|
| 25S_rDNA          | 25S_rDNA          | 1      | 7.2e-05 |            |
| Ty3_gypsy Ty3-GAG | Ty3_gypsy Ty3-GAG | 1      | 7.2e-05 |            |
| Ty3_gypsy Ty3-INT | Ty3_gypsy Ty3-INT | 1      | 7.2e-05 |            |

### clusters with similarity:

| Cluster | Number of similarity hits |
|---------|---------------------------|
| 9       | 5120                      |
| 53      | 4550                      |
| 94      | 727                       |
| 89      | 618                       |
| 187     | 10                        |
| 27      | 13                        |
| 2410    | 4                         |
| 296     | 3                         |
| 4       | 15                        |

### clusters connected through mates:

| Cluster | Number of shared read pairs | k      |
|---------|-----------------------------|--------|
| 9       | 467                         | 0.149  |
| 53      | 183                         | 0.126  |
| 89      | 94                          | 0.0757 |
| 1       | 64                          | 0.0198 |
| 94      | 53                          | 0.0423 |
| 7       | 50                          | 0.0276 |
| 11      | 44                          | 0.0366 |
| 27      | 42                          | 0.0279 |
| 106     | 17                          | 0.0041 |

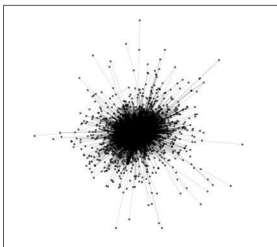

Supplement: pone.0223466.s006.pdf [file pone.0223466.s006.pdf]
