# Supplementary material for: De novo identification of satellite DNAs in the sequenced genomes of Drosophila virilis and D. americana using the RepeatExplorer and TAREAN pipelines
Source: PubMed Central journal article supplement (PMC6922343; doi:10.1371/journal.pone.0223466), 2019-12-19

## Cluster no. 2

[Go back to cluster table](#)

Cluster is part of [supercluster: 2](#)

### Cluster characteristics:

|                       |                                                                                                                                                                        |
|-----------------------|------------------------------------------------------------------------------------------------------------------------------------------------------------------------|
| size                  | 13646                                                                                                                                                                  |
| size_real             | 25372                                                                                                                                                                  |
| ecount                | 20004210                                                                                                                                                               |
| supercluster          | 2                                                                                                                                                                      |
| annotations_summary   |                                                                                                                                                                        |
| pair_completeness     | 0.752209944751381                                                                                                                                                      |
| pbs_score             | 0                                                                                                                                                                      |
| TR_score              | 0.58228                                                                                                                                                                |
| TR_monomer_length     | 171                                                                                                                                                                    |
| loop_index            | 0.967457577315801                                                                                                                                                      |
| satellite_probability | 0.0488727035644302                                                                                                                                                     |
| consensus             | TAACTCGGTCAAATCTCATCCGATTTTCACGAAGTTTGGCTTTTCTTCATGGTTTTCCCTCTAGATTAATCTGGCATTCAAATCTCGACACCGATTTTTAGTCGAAATTCATGTCCAAATCTTACCCCAAGATTCTGATATAGACATGGTCAAAAATACCACCCCA |
| TAREAN_annotation     | Putative satellite (low confidence)                                                                                                                                    |
| orientation_score     | 1                                                                                                                                                                      |

### Reads annotation summary

No similarity hits to repeat databases found

### clusters with similarity:

| Cluster | Number of similarity hits |
|---------|---------------------------|
| 9       | 546000                    |
| 5       | 3000                      |
| 11      | 1460                      |
| 8       | 458                       |
| 202     | 50                        |
| 656     | 20                        |
| 36      | 5                         |
| 20      | 3                         |
| 5930    | 2                         |

### clusters connected through mates:

| Cluster | Number of shared read pairs | k       |
|---------|-----------------------------|---------|
| 9       | 1540                        | 0.533   |
| 5       | 356                         | 0.0412  |
| 8       | 180                         | 0.0273  |
| 11      | 63                          | 0.0177  |
| 36      | 23                          | 0.0112  |
| 20      | 21                          | 0.00795 |
| 1       | 16                          | 0.00648 |
| 49      | 13                          | 0.00662 |
| 656     | 10                          | 0.00555 |

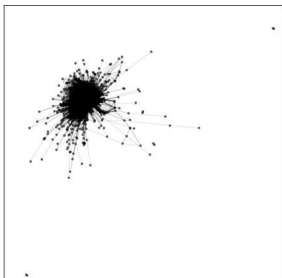

Supplement: pone.0223466.s011.pdf [file pone.0223466.s011.pdf]
