# Supplementary material for: De novo identification of satellite DNAs in the sequenced genomes of Drosophila virilis and D. americana using the RepeatExplorer and TAREAN pipelines
Source: PubMed Central journal article supplement (PMC6922343; doi:10.1371/journal.pone.0223466), 2019-12-19

## Cluster no. 4

[Go back to cluster table](#)

Cluster is part of [supercluster: 3](#)

### Cluster characteristics:

|                       |                                                                                                                                                                                                                                        |
|-----------------------|----------------------------------------------------------------------------------------------------------------------------------------------------------------------------------------------------------------------------------------|
| size                  | 7182                                                                                                                                                                                                                                   |
| size_real             | 7182                                                                                                                                                                                                                                   |
| ecount                | 9236382                                                                                                                                                                                                                                |
| supercluster          | 3                                                                                                                                                                                                                                      |
| annotations_summary   |                                                                                                                                                                                                                                        |
| pair_completeness     | 0.876175548589342                                                                                                                                                                                                                      |
| pbs_score             | 0                                                                                                                                                                                                                                      |
| TR_score              | 0.814736591791589                                                                                                                                                                                                                      |
| TR_monomer_length     | 225                                                                                                                                                                                                                                    |
| loop_index            | 0.994708994708995                                                                                                                                                                                                                      |
| satellite_probability | 0.69915681403055                                                                                                                                                                                                                       |
| consensus             | TTTAATAACACTTTTATAACTTCATTATTCTTTTATATAAACATAAATTGACTTATGCCGGCAABGGCAACACTCCACA<br>GTCATATGAATTTACCGTATTTAAAATTTTCATATGACATGCCTTGCBCGACACCACTCCCATATATAGGTTTTTTGACA<br>CATCATCTATAATGGCGATATTTTTCCAAATGCTACCATTACCTTAATGTCTTCATGTACTAA |
| TAREAN_annotation     | Putative satellite (low confidence)                                                                                                                                                                                                    |
| orientation_score     | 1                                                                                                                                                                                                                                      |

### Reads annotation summary

No similarity hits to repeat databases found

### clusters with similarity:

| Cluster | Number of similarity hits |
|---------|---------------------------|
| 12      | 2060                      |
| 150     | 19                        |

### clusters connected through mates:

| Cluster | Number of shared read pairs | k       |
|---------|-----------------------------|---------|
| 12      | 168                         | 0.4     |
| 1       | 31                          | 0.0135  |
| 81      | 15                          | 0.0591  |
| 2       | 8                           | 0.00562 |
| 150     | 8                           | 0.0322  |
| 9       | 4                           | 0.00184 |
| 13      | 3                           | 0.00548 |
| 505     | 3                           | 0.0123  |
| 5       | 2                           | 0.00168 |

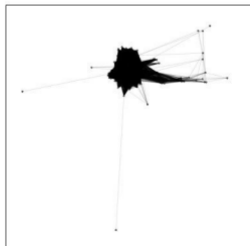

Supplement: pone.0223466.s012.pdf [file pone.0223466.s012.pdf]
