# Supplementary material for: De novo identification of satellite DNAs in the sequenced genomes of Drosophila virilis and D. americana using the RepeatExplorer and TAREAN pipelines
Source: PubMed Central journal article supplement (PMC6922343; doi:10.1371/journal.pone.0223466), 2019-12-19

## Cluster no. 7

[Go back to cluster table](#)

Cluster is part of [supercluster: 3](#)

### Cluster characteristics:

|                       |                                                                                                                                                                                                                                          |
|-----------------------|------------------------------------------------------------------------------------------------------------------------------------------------------------------------------------------------------------------------------------------|
| size                  | 10235                                                                                                                                                                                                                                    |
| size_real             | 11853                                                                                                                                                                                                                                    |
| ecount                | 19989815                                                                                                                                                                                                                                 |
| supercluster          | 3                                                                                                                                                                                                                                        |
| annotations_summary   |                                                                                                                                                                                                                                          |
| pair_completeness     | 0.861045690061234                                                                                                                                                                                                                        |
| pbs_score             | 0                                                                                                                                                                                                                                        |
| TR_score              | 0.926558888888889                                                                                                                                                                                                                        |
| TR_monomer_length     | 225                                                                                                                                                                                                                                      |
| loop_index            | 0.974694675134343                                                                                                                                                                                                                        |
| satellite_probability | 0.767082439601018                                                                                                                                                                                                                        |
| consensus             | ACATGCCCTTCTCGACACCACTCCCTATATAAGTTTTTTGACACGTCATCTATAATGGCGATATTTTTCCAAATGCTAC<br>CATTCACTTAAGGTCATCATGTACTAATTTAAATACATTTATAAAGCTTCATTATCTTTTTATTTTAAACATAATTG<br>ACTTATGCCGCGCAAGCGCAACACTCCACAGTCATATGAATTTACCGTATTTAAAATTTTTTCATATG |
| TAREAN_annotation     | Putative satellite (high confidence)                                                                                                                                                                                                     |
| orientation_score     | 1                                                                                                                                                                                                                                        |

### Reads annotation summary

No similarity hits to repeat databases found

### clusters with similarity:

| Cluster | Number of similarity hits |
|---------|---------------------------|
| 12      | 43100                     |
| 27      | 338                       |

### clusters connected through mates:

| Cluster | Number of shared read pairs | k        |
|---------|-----------------------------|----------|
| 12      | 686                         | 0.809    |
| 27      | 166                         | 0.295    |
| 304     | 16                          | 0.0352   |
| 1       | 1                           | 0.000896 |
| 4       | 1                           | 0.000463 |
| 5       | 1                           | 0.000137 |
| 11700   | 1                           | 0.00225  |
| 24800   | 1                           | 0.00225  |
| 28200   | 1                           | 0.00225  |

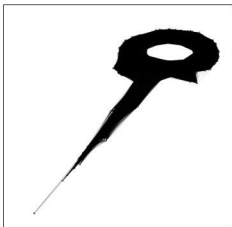

Supplement: pone.0223466.s013.pdf [file pone.0223466.s013.pdf]
