# Supplementary material for: De novo identification of satellite DNAs in the sequenced genomes of Drosophila virilis and D. americana using the RepeatExplorer and TAREAN pipelines
Source: PubMed Central journal article supplement (PMC6922343; doi:10.1371/journal.pone.0223466), 2019-12-19

**a****859692 read total**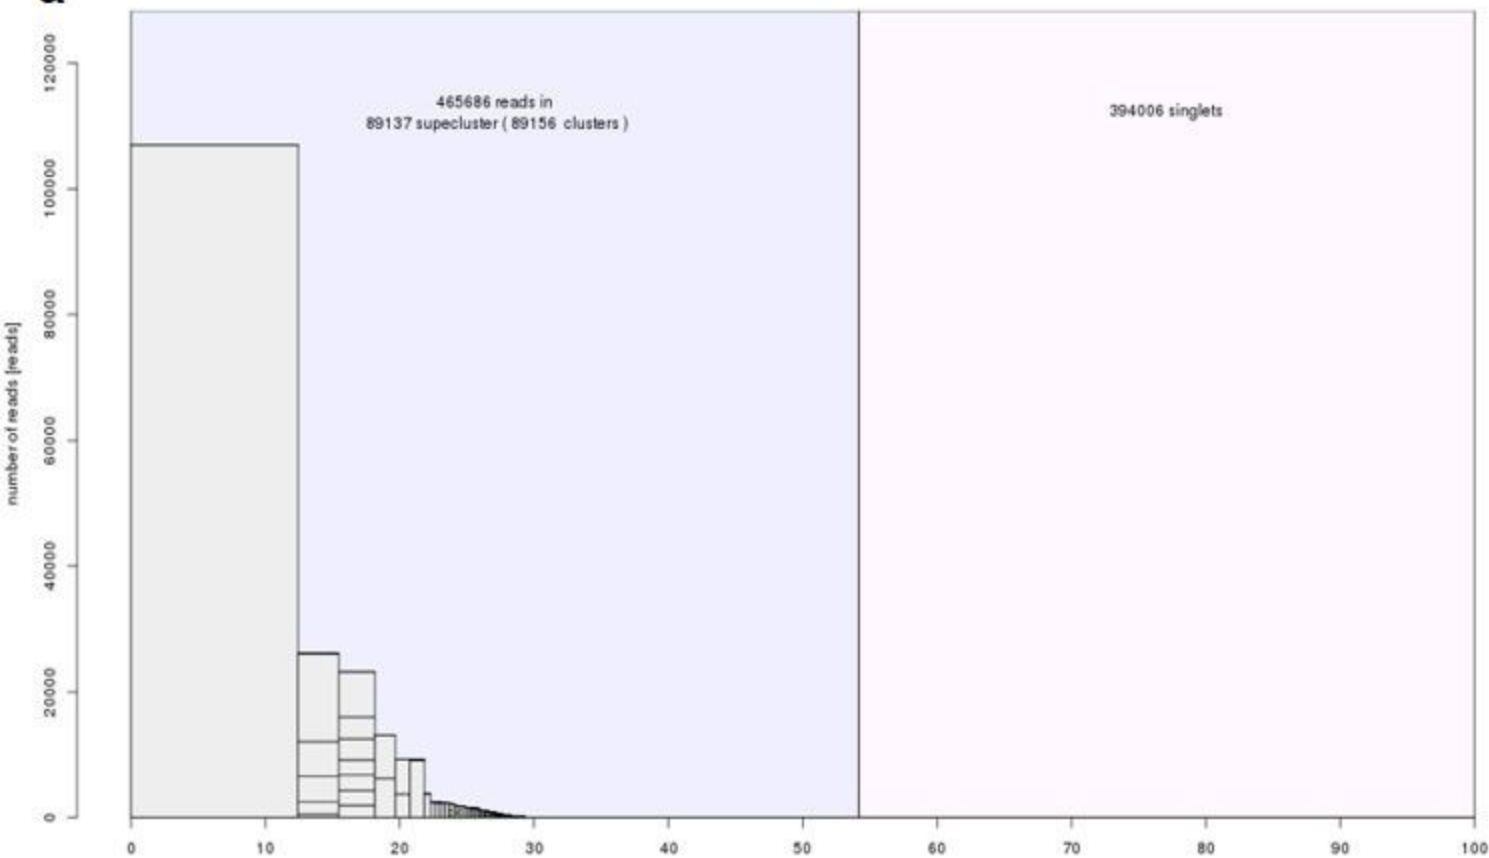**b****1219656 read total**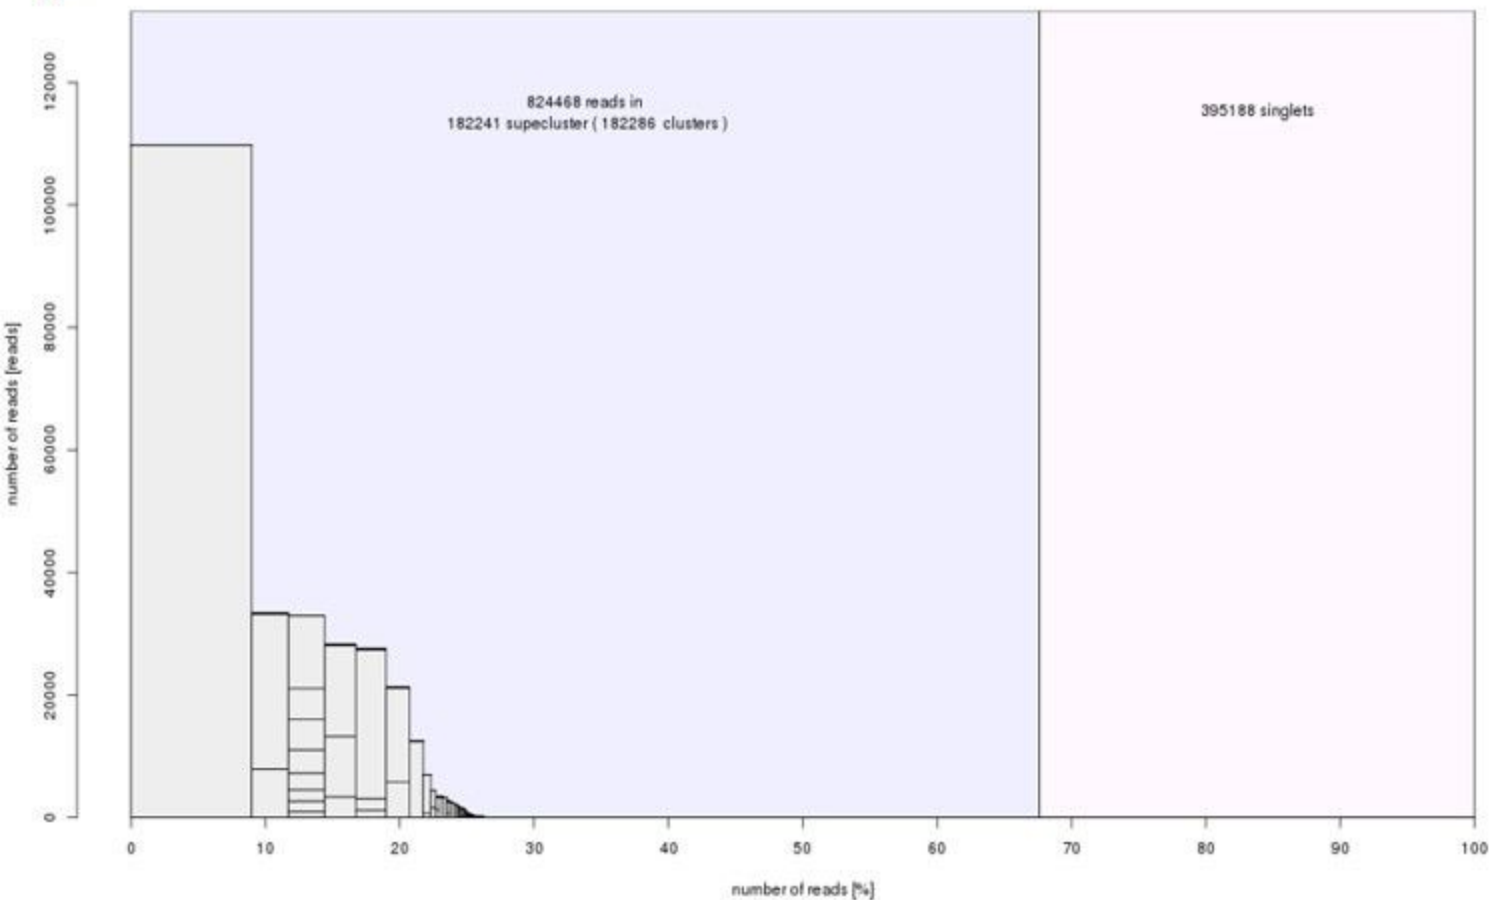

Supplement: pone.0223466.s001.pdf [file pone.0223466.s001.pdf]
