# Supplementary material for: De novo identification of satellite DNAs in the sequenced genomes of Drosophila virilis and D. americana using the RepeatExplorer and TAREAN pipelines
Source: PubMed Central journal article supplement (PMC6922343; doi:10.1371/journal.pone.0223466), 2019-12-19
Supplement: pone.0223466.s002.pdf [file pone.0223466.s002.pdf]

CL5  
6881

■ NAN

CL6  
6233

CL5 ----> CL6

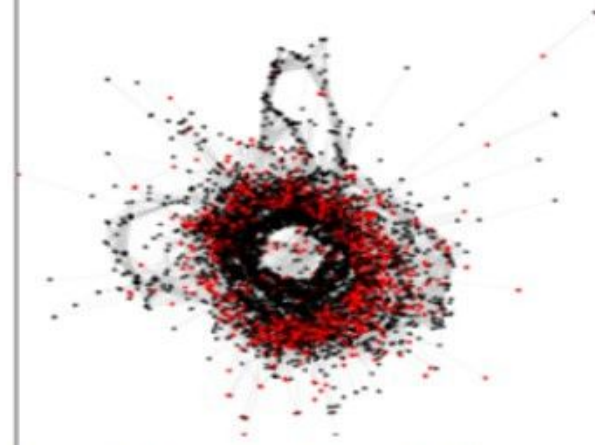

No. of shared pairs: :1242

CL6 ----> CL5

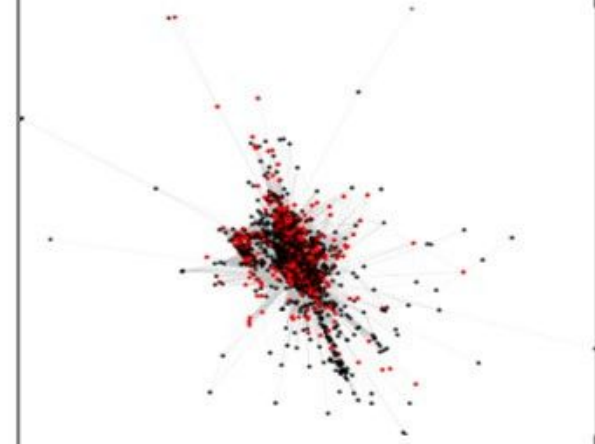

No. of shared pairs: :1242
