# Supplementary material for: De novo identification of satellite DNAs in the sequenced genomes of Drosophila virilis and D. americana using the RepeatExplorer and TAREAN pipelines
Source: PubMed Central journal article supplement (PMC6922343; doi:10.1371/journal.pone.0223466), 2019-12-19
Supplement: pone.0223466.s003.pdf [file pone.0223466.s003.pdf]

CL4  
15385

■ NAN

CL11  
5811

CL4 ----> CL11

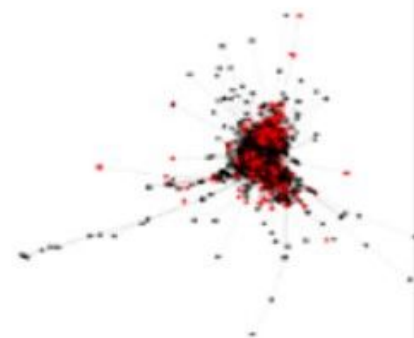

No. of shared pairs: :2795

CL11 ----> CL4

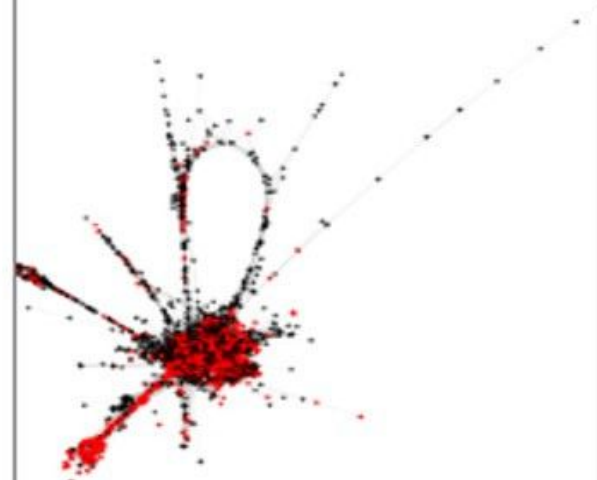

No. of shared pairs: :2795
