# Supplementary material for: De novo identification of satellite DNAs in the sequenced genomes of Drosophila virilis and D. americana using the RepeatExplorer and TAREAN pipelines
Source: PubMed Central journal article supplement (PMC6922343; doi:10.1371/journal.pone.0223466), 2019-12-19

# Cluster no. 1

[Go back to cluster table](#)

Cluster is part of [supercluster: 1](#)

## Cluster characteristics:

size 40000  
size\_real 106913  
ecount 890629  
supercluster 1  
annotations\_summary 0.00% Class\_I/LTR/Ty3\_gypsy:Ty3-INT  
pair\_completeness 0.926082726814153  
pbs\_score 0  
TR\_score 0.866992134831461  
TR\_monomer\_length 7  
loop\_index 0.967241119429232  
satellite\_probability 0.819019943211142  
consensus TTTGTAG  
TAREAN\_annotation Putative satellite (high confidence)  
orientation\_score 0.999951596208121

## Reads annotation summary

| cl_string                           | domain | Freq    | proportion |
|-------------------------------------|--------|---------|------------|
| Ty3_gypsy Ty3-INT Ty3_gypsy Ty3-INT | 1      | 9.4e-06 |            |

## clusters with similarity:

| Cluster | Number of similarity hits |
|---------|---------------------------|
| 39      | 2                         |
| 43      | 2                         |

## clusters connected through mates:

| Cluster | Number of shared read pairs | k       |
|---------|-----------------------------|---------|
| 2       | 64                          | 0.0198  |
| 3       | 31                          | 0.013   |
| 4       | 31                          | 0.0135  |
| 8       | 29                          | 0.00672 |
| 5       | 26                          | 0.00865 |
| 7       | 24                          | 0.00897 |
| 11      | 22                          | 0.00872 |
| 6       | 19                          | 0.0063  |
| 13      | 19                          | 0.00805 |

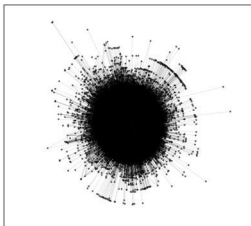

Supplement: pone.0223466.s004.pdf [file pone.0223466.s004.pdf]
