# Supplementary material for: De novo identification of satellite DNAs in the sequenced genomes of Drosophila virilis and D. americana using the RepeatExplorer and TAREAN pipelines
Source: PubMed Central journal article supplement (PMC6922343; doi:10.1371/journal.pone.0223466), 2019-12-19

# Cluster no. 1

[Go back to cluster table](#)

Cluster is part of [supercluster: 1](#)

## Cluster characteristics:

size 40000  
size\_real 109744  
ecount 953793  
supercluster 1  
annotations\_summary  
pair\_completeness 0.97573182587405  
pbs\_score 0  
TR\_score 0.8942122222222222  
TR\_monomer\_length 7  
loop\_index 0.964715639214898  
satellite\_probability 0.917376582447331  
consensus TACAAC  
TAREAN\_annotation Putative satellite (high confidence)  
orientation\_score 1

## Reads annotation summary

No similarity hits to repeat databases found

## clusters with similarity:

| Cluster | Number of similarity hits |
|---------|---------------------------|
| 6       | 19                        |
| 54      | 2                         |
| 760     | 2                         |

## clusters connected through mates:

| Cluster | Number of shared read pairs | k       |
|---------|-----------------------------|---------|
| 6       | 168                         | 0.0887  |
| 3       | 17                          | 0.00682 |
| 2       | 16                          | 0.00648 |
| 54      | 12                          | 0.0162  |
| 11      | 11                          | 0.00451 |
| 121     | 10                          | 0.0144  |
| 77      | 9                           | 0.0122  |
| 4       | 5                           | 0.00209 |
| 76      | 5                           | 0.00735 |

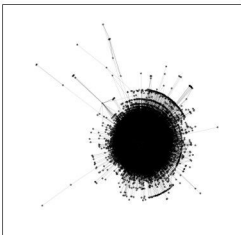

Supplement: pone.0223466.s005.pdf [file pone.0223466.s005.pdf]
