# Supplementary material for: De novo identification of satellite DNAs in the sequenced genomes of Drosophila virilis and D. americana using the RepeatExplorer and TAREAN pipelines
Source: PubMed Central journal article supplement (PMC6922343; doi:10.1371/journal.pone.0223466), 2019-12-19

## Cluster no. 3

[Go back to cluster table](#)

Cluster is part of [supercluster: 5](#)

### Cluster characteristics:

size 15038  
size\_real 24408  
ecount 19830835  
supercluster 5  
annotations\_summary 0.00% Class\_I/LTR/Ty3\_gypsy:Ty3-RT  
pair\_completeness 0.740444951511694  
pbs\_score 0  
TR\_score 0.506713953488372  
TR\_monomer\_length 154  
loop\_index 0.961499966637753  
satellite\_probability 0.0439494278251884  
consensus TTAAGTTTTGTATGAAAAAACATTTTGTATCAAGATATCTTGACCAAACTCGGCATTATTAGTTTTACTATACTCC  
TCATATATATGC AAAATCCTATTAAGATCGGACCACTATATCATATAGCTGCCATAGGAACGATCGGTCGAAAA  
TAREAN\_annotation Putative satellite (low confidence)  
orientation\_score 0.999999949584211

### Reads annotation summary

| cl_string                         | domain | Freq    | proportion |
|-----------------------------------|--------|---------|------------|
| Ty3_gypsy Ty3-RT Ty3_gypsy Ty3-RT | 1      | 4.1e-05 |            |

### clusters with similarity:

| Cluster | Number of similarity hits |
|---------|---------------------------|
| 25      | 41500                     |
| 32      | 5620                      |
| 8       | 99                        |
| 29      | 11                        |
| 43      | 6                         |
| 60      | 6                         |
| 10      | 4                         |
| 1410    | 3                         |
| 4       | 1                         |

### clusters connected through mates:

| Cluster | Number of shared read pairs | k       |
|---------|-----------------------------|---------|
| 25      | 678                         | 0.246   |
| 8       | 599                         | 0.0904  |
| 32      | 402                         | 0.167   |
| 5       | 108                         | 0.0124  |
| 10      | 60                          | 0.024   |
| 29      | 50                          | 0.0216  |
| 15      | 31                          | 0.00933 |
| 43      | 19                          | 0.00976 |
| 1       | 1                           | 0.00001 |

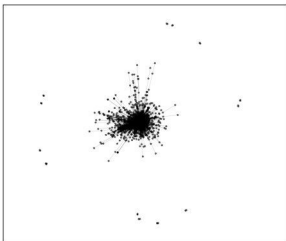

Supplement: pone.0223466.s007.pdf [file pone.0223466.s007.pdf]
