# Supplementary material for: De novo identification of satellite DNAs in the sequenced genomes of Drosophila virilis and D. americana using the RepeatExplorer and TAREAN pipelines
Source: PubMed Central journal article supplement (PMC6922343; doi:10.1371/journal.pone.0223466), 2019-12-19

## Cluster no. 5

[Go back to cluster table](#)

Cluster is part of [supercluster: 4](#)

### Cluster characteristics:

size 6881  
size\_real 6881  
ecount 833175  
supercluster 4  
annotations\_summary  
pair\_completeness 0.565999089667729  
pbs\_score 0  
TR\_score 0.376863561660416  
TR\_monomer\_length 370  
loop\_index 0.947284112421727  
satellite\_probability 0.0113560037017239

consensus  
TGGCCGATTTGGGTCAAAATTTAGATTTCTATTTTTGATGCCAGTCGATAGTACTGATCCTTACGAGTCCAAAATGGT  
ATAAAATTTGAAAATCGACATTATTTGGCCGAGATATTCAAAAAATCATAAGGAAAGGTTGACTTACAAACGAATCA  
TTTTCCGGTCCACATCTTTTGTAAACCATCGATTTTTAATTGTTTGAATGCCAATTTGATAGTAGGGATCCGTACAAAT  
TCAAAAAGGTATAATTTGAAAATCAGACTTTATTTACCGAGATATTAAAAAAATCATCAAAAAGGTTTGATTTT  
CGAACCGACCCCGATTTTGATAAAAACGTGATGTAACCCTTGCATT

TAREAN\_annotation Putative satellite (low confidence)

orientation\_score 0.999979608360572

### Reads annotation summary

No similarity hits to repeat databases found

### clusters with similarity:

| Cluster | Number of similarity hits |
|---------|---------------------------|
| 6       | 28100                     |
| 26      | 46                        |
| 87      | 26                        |
| 9       | 6                         |
| 24      | 5                         |
| 8       | 2                         |
| 73      | 2                         |
| 1       | 1                         |
| 2       | 1                         |
| 46      | 1                         |

### clusters connected through mates:

| Cluster | Number of shared read pairs | k       |
|---------|-----------------------------|---------|
| 6       | 1240                        | 0.648   |
| 87      | 53                          | 0.0532  |
| 26      | 48                          | 0.0456  |
| 8       | 37                          | 0.0115  |
| 9       | 30                          | 0.0104  |
| 24      | 28                          | 0.0165  |
| 1       | 26                          | 0.00865 |
| 2       | 12                          | 0.00561 |
| 7       | 9                           | 0.00571 |

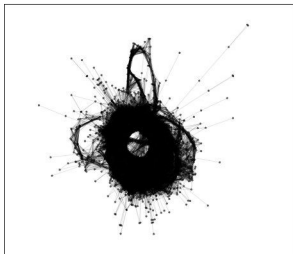

Supplement: pone.0223466.s008.pdf [file pone.0223466.s008.pdf]
