# Supplementary material for: De novo identification of satellite DNAs in the sequenced genomes of Drosophila virilis and D. americana using the RepeatExplorer and TAREAN pipelines
Source: PubMed Central journal article supplement (PMC6922343; doi:10.1371/journal.pone.0223466), 2019-12-19

## Cluster no. 4

[Go back to cluster table](#)

Cluster is part of [supercluster\\_6](#)

### Cluster characteristics:

size 12605  
size\_real 15385  
ecount 19984293  
supercluster 6  
annotations\_summary  
pair\_completeness 0.634962805526036  
pbs\_score 0  
TR\_score 0.6856111111111111  
TR\_monomer\_length 199  
loop\_index 0.97190030163518  
satellite\_probability 0.0194654605841841  
consensus ATTTTATACCAATTTGGACTCGTAAGGATCAGTACTATCGACTGGCATCAAAAAATGAAAAATCAAATTTTGACCCAAA  
TCGACCAAAATGGCAAAGGGTTACATCACGATTTTATCAAAAATCGGGTTCGGTTCGAAAAACAACCTTTTTGATGAT  
TTTTTGAATATCTCGGCCAAATAGTGCCGATTTCAA  
TAREAN\_annotation Putative satellite (low confidence)  
orientation\_score 1

### Reads annotation summary

No similarity hits to repeat databases found

### clusters with similarity:

| Cluster | Number of similarity hits |
|---------|---------------------------|
| 11      | 290000                    |
| 68      | 1900                      |
| 36      | 1020                      |
| 8       | 18                        |
| 9       | 5                         |
| 85      | 4                         |
| 573     | 3                         |
| 3       | 2                         |
| 834     | 1                         |

### clusters connected through mates:

| Cluster | Number of shared read pairs | k       |
|---------|-----------------------------|---------|
| 11      | 2800                        | 0.803   |
| 36      | 121                         | 0.0613  |
| 68      | 60                          | 0.0338  |
| 5       | 40                          | 0.00467 |
| 85      | 21                          | 0.012   |
| 8       | 11                          | 0.00169 |
| 3       | 8                           | 0.00226 |
| 1       | 5                           | 0.00209 |
| 89      | 5                           | 0.00283 |

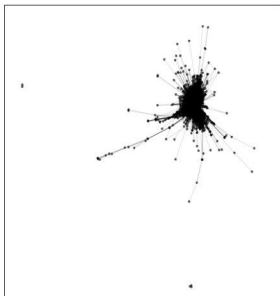

Supplement: pone.0223466.s009.pdf [file pone.0223466.s009.pdf]
