# Supplementary material for: De novo identification of satellite DNAs in the sequenced genomes of Drosophila virilis and D. americana using the RepeatExplorer and TAREAN pipelines
Source: PubMed Central journal article supplement (PMC6922343; doi:10.1371/journal.pone.0223466), 2019-12-19

## Cluster no. 3

[Go back to cluster table](#)

Cluster is part of [supercluster: 6](#)

### Cluster characteristics:

size 9210  
size\_real 9210  
ecount 737297  
supercluster 6  
annotations\_summary  
pair\_completeness 0.86815415821501  
pbs\_score 0.1631687  
TR\_score 0.367599156926614  
TR\_monomer\_length 171  
loop\_index 0.975895765472313  
satellite\_probability 0.751881405964912  
consensus AGACATAGTCAAAATTTCCACCCCCATAACTCGGTCAAATCTCATCCGATTTTCACGAGGTTGGCTTTTGTTCATGG  
TTTTCCCTCTAGATTAATTTGGCATCAAATCTGACAACATAATTTTGGTCAAAATTCATGTCAAAATCTTACCCCAAG  
ATTCTATAT  
TAREAN\_annotation Putative satellite (high confidence)  
orientation\_score 1

### Reads annotation summary

No similarity hits to repeat databases found

### clusters connected through mates:

| Cluster | Number of shared read pairs | k       |
|---------|-----------------------------|---------|
| 1       | 31                          | 0.013   |
| 44      | 13                          | 0.0358  |
| 8       | 10                          | 0.00386 |
| 2       | 7                           | 0.00463 |
| 30      | 4                           | 0.0106  |
| 3890    | 4                           | 0.0122  |
| 11      | 3                           | 0.00377 |
| 11500   | 3                           | 0.00919 |
| 6       | 2                           | 0.00155 |

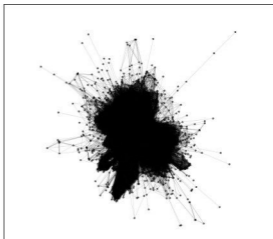

Supplement: pone.0223466.s010.pdf [file pone.0223466.s010.pdf]
