# Supplementary material for: De novo identification of satellite DNAs in the sequenced genomes of Drosophila virilis and D. americana using the RepeatExplorer and TAREAN pipelines
Source: PubMed Central journal article supplement (PMC6922343; doi:10.1371/journal.pone.0223466), 2019-12-19

# Cluster no. 6

[Go back to cluster table](#)

Cluster is part of [supercluster: 4](#)

## Cluster characteristics:

|                       |                                      |
|-----------------------|--------------------------------------|
| size                  | 6233                                 |
| size_real             | 6233                                 |
| ecount                | 3935339                              |
| supercluster          | 4                                    |
| annotations_summary   |                                      |
| pair_completeness     | 0.528070605540574                    |
| pbs_score             | 0                                    |
| TR_score              | 0.428520374613522                    |
| TR_monomer_length     | 36                                   |
| loop_index            | 0.948564158487823                    |
| satellite_probability | 0.00706301117869965                  |
| consensus             | TAACTCCGCGCGGAGATATGACGTTCCAAAACGACA |
| TAREAN_annotation     | Putative satellite (low confidence)  |
| orientation_score     | 0.999850127773719                    |

## Reads annotation summary

No similarity hits to repeat databases found

## clusters with similarity:

| Cluster | Number of similarity hits |
|---------|---------------------------|
| 46      | 31000                     |
| 5       | 28100                     |
| 87      | 738                       |
| 130     | 355                       |
| 26      | 275                       |
| 91      | 55                        |
| 9       | 48                        |
| 182     | 23                        |
| 707     | 6                         |

## clusters connected through mates:

| Cluster | Number of shared read pairs | k       |
|---------|-----------------------------|---------|
| 5       | 1240                        | 0.648   |
| 8       | 61                          | 0.0189  |
| 46      | 49                          | 0.048   |
| 9       | 42                          | 0.0145  |
| 24      | 30                          | 0.0176  |
| 87      | 23                          | 0.0229  |
| 1       | 19                          | 0.0063  |
| 7       | 12                          | 0.00756 |
| 142     | 8                           | 0.00811 |

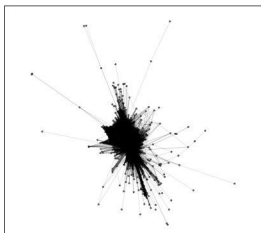

Supplement: pone.0223466.s014.pdf [file pone.0223466.s014.pdf]
