# Supplementary material for: De novo identification of satellite DNAs in the sequenced genomes of Drosophila virilis and D. americana using the RepeatExplorer and TAREAN pipelines
Source: PubMed Central journal article supplement (PMC6922343; doi:10.1371/journal.pone.0223466), 2019-12-19

## Cluster no. 11

[Go back to cluster table](#)

Cluster is part of [supercluster: 6](#)

### Cluster characteristics:

|                       |                      |
|-----------------------|----------------------|
| size                  | 5811                 |
| size_real             | 5811                 |
| ecount                | 900900               |
| supercluster          | 6                    |
| annotations_summary   |                      |
| pair_completeness     | 0.244325481798715    |
| pbs_score             | None                 |
| TR_score              | None                 |
| TR_monomer_length     | None                 |
| loop_index            | 0.727491823033224    |
| satellite_probability | 0.000245279889944418 |
| consensus             | None                 |
| TAREAN_annotation     | Other                |
| orientation_score     | 0.999998890205845    |

### Reads annotation summary

No similarity hits to repeat databases found

### clusters with similarity:

| Cluster | Number of similarity hits |
|---------|---------------------------|
| 4       | 290000                    |
| 2       | 1460                      |
| 36      | 592                       |
| 5       | 32                        |
| 85      | 2                         |
| 9       | 1                         |

### clusters connected through mates:

| Cluster | Number of shared read pairs | k       |
|---------|-----------------------------|---------|
| 4       | 2800                        | 0.803   |
| 36      | 143                         | 0.0708  |
| 5       | 100                         | 0.0116  |
| 2       | 63                          | 0.0177  |
| 68      | 48                          | 0.0263  |
| 8       | 29                          | 0.00441 |
| 85      | 24                          | 0.0133  |
| 9       | 16                          | 0.00558 |
| 1       | 11                          | 0.00451 |

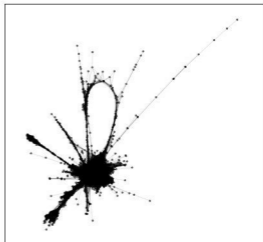

Supplement: pone.0223466.s015.pdf [file pone.0223466.s015.pdf]
